# Supplementary material for: Specific Mycobacterium tuberculosis Strain Circulating in Prison Revealed by Cost-Effective Amplicon Sequencing
Source: MDPI journal article supplement (doi:10.3390/microorganisms12050999), 2024-05-15
Supplement: s1 [file s1]

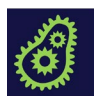

## Supplementary Material

File S1. Pipeline used to analyze sequencing data starting from fastq generated after Illumina run:

- Sickle (sequence quality filter)

```
sickle pe -f <name>_R1.fastq -r <name>_R2.fastq -t sanger -o <name>_F_trimmed -p <name>_R_trimmed -s <name>_trimmed
```

- BWA (mapping against reference genome H37v\_NC\_000962.3)

```
bwa index -p H37Rv_NC_000962.3_index -a is H37Rv_NC_000962.3.fasta
```

```
bwa mem / H37Rv_NC_000962.3_index ../<name>_R1.fastq ../<name>_R2.fastq > -o <name>_alin_vs_lin.sam
```

- Sam to bam (transformation of bwa output to analyze SNP)

```
samtools view -S -b <name>_alin_vs_lin.sam > <name>_alin_lin.bam
```

```
samtools sort -o <name>_sorted_alin_lin.bam <name>_alin_lin.bam
```

```
samtools index -b <name>_sorted_alin_lin.bam <name>sorted_alin_lin.bam.bai
```

- bcftools mpileup (SNPs analysis)

```
bcftools mpileup -O b -o <name>.bcf -f /gen_lineage.fasta <name>_sorted_alin_lin.bam
```

- Variant calling (Identification of SNPs)

```
bcftools call -o <name>.vcf -mv <name>.bcf
```

```
bcftools filter --exclude "QUAL < 30" <name>.vcf > <name>_filtered.vcf
```

```
bcftools view -v snps <name>_filtered.vcf | more
```

```
ls | less -S <name>.vcf | grep -v "##" | cut -f1,2,3,4,5,6,10 | sed '/^#{x;p;x}' > snp.txt
```

Table S1: Sample information. Age, Gender and bacterial culture results, previous culture (relapse) and HIV information were recorded. Reclusion Center: N°4 (-34.8036113,-56.3547671), N°5 (-34.791844, -56.230891), N°6 (-34.8363927,-56.092903), N°7 (-34.5270384,-56.2663051), N°18 (-33.379260, -56.521940). \* Detected at Entry Center, then transferred to N°4.

| ID | Age | Sex | Bacterial culture | Relapse | HIV | Reclusion Center |
|----|-----|-----|-------------------|---------|-----|------------------|
| 1  | 25  | M   | Positive ++       | 0       | 0   | N°4*             |
| 2  | 28  | M   | Positive ++       |         |     | N°6              |
| 3  | 20  | M   | Positive +        | 0       | 0   | N°4*             |
| 4  | 31  | M   | Positive ++       |         |     | N°4*             |
| 5  | 35  | M   | Positive <20      | 0       | 0   | N°4*             |
| 6  | 43  | F   | Positive <20      | 0       | 0   | N°18             |
| 7  | 60  | M   | Positive +++      | 0       | 0   | N°4*             |
| 8  | 24  | M   | Positive ++       | 0       | 0   | N°4*             |
| 9  | 23  | M   | Positive +        | 0       | 0   | N°4*             |
| 10 | 46  | M   | Positive <20      | 0       | 0   | N°4*             |
| 11 | 54  | M   | Positive +        | 0       | 0   | N°4*             |
| 12 | 33  | M   | Positive <20      | 0       | 0   | N°4*             |
| 13 | 27  | M   | Positive +++      | 0       | 0   | N°6              |
| 14 | 26  | M   | Positive <20      | 0       | 0   | N°4              |
| 15 | 26  | M   | Positive ++       | 0       | 0   | N°4*             |
| 16 | 30  | M   | Positive +        |         |     | N°4*             |
| 17 | 22  | M   | Positive <20      | 0       | 0   | N°4*             |
| 18 | 28  | M   | Positive +++      | 0       | 0   | N°4*             |
| 19 | 40  | M   | Positive <20      | 0       | 0   | N°4*             |
| 20 | 39  | M   | Positive <20      | 0       | 0   | N°4*             |
| 21 | 73  | M   | Positive <20      | 1       | 0   | N°4*             |
| 22 | 37  | M   | Positive +        | 0       | 0   | N°4*             |
| 23 | 25  | F   | Positive <20      | 0       | 0   | N°5              |
| 24 | 48  | F   | Positive <20      |         |     | N°5              |
| 25 | 21  | M   | Positive +++      | 0       | 0   | N°6              |
| 26 | 43  | M   | Positive <20      | 0       | 0   | N°4*             |
| 27 | 46  | M   | Positive +++      | 0       | 0   | N°4*             |
| 28 | 24  | M   | Positive ++       | 0       | 0   | N°4              |
| 29 | 25  | M   | Positive +        | 0       | 0   | N°4*             |
| 30 | 41  | M   | Positive <20      | 0       | 0   | N°4*             |
| 31 | 32  | M   | Positive <20      | 1       | 0   | N°7              |
| 32 | 31  | F   | Positive ++       | 0       | 0   | N°5              |
| 33 | 27  | M   | Positive +        | 0       | 0   | N°7              |
| 34 | 30  | M   | Positive <20      |         |     | N°6              |
| 35 | 23  | M   | Positive +++      | 0       | 0   | N°4*             |
| 36 | 35  | M   | Positive +++      | 0       | 0   | N°4*             |
| 37 | 34  | M   | Positive <20      | 0       | 0   | N°6              |
| 38 | 38  | M   | Positive +++      | 1       | 0   | N°6              |
| 39 | 29  | M   | Positive <20      | 0       | 0   | N°4*             |
| 40 | 36  | M   | Positive +++      | 0       | 0   | N°4*             |

|    |    |   |              |   |   |      |
|----|----|---|--------------|---|---|------|
| 41 | 19 | M | Positive <20 | 0 | 0 | N°7  |
| 42 | 29 | M | Positive <20 | 0 | 1 | N°4* |
| 43 | 41 | M | Positive <20 | 0 | 0 | N°4* |
| 44 | 32 | M | Positive +++ | 0 | 0 | N°6  |
| 45 | 35 | M | Positive +   | 0 | 0 | N°4  |
| 46 | 31 | M | Positive <20 | 1 | 0 | N°4  |
| 47 | 39 | M | Positive <20 | 0 | 0 | N°4* |

Table S2: Lineage Region information. The table indicates the lineage, the name or denomination it receives, the gene and the position of the mutation with respect to the reference genome. Additionally, the base change, the codon number where it occurs, is indicated. They are all silent substitutions so there is no amino acid change.

| Lineage        | Sublineage | Position* | Gen coord. | Allelic change | Codon number | Codon Change | AA change | ID Locus | Gen name |
|----------------|------------|-----------|------------|----------------|--------------|--------------|-----------|----------|----------|
| lineage7       | Lineage 7  | 1137518   | 543        | G/A            | 181          | AAC/AAT      | N/N       | Rv1018c  | glmU     |
| lineage6       | Lineage 6  | 1816587   | 399        | C/G            | 133          | GTC/GTG      | V/V       | Rv1617   | pykA     |
| lineage5       | Lineage 5  | 1799921   | 339        | C/A            | 113          | GGC/GGA      | G/G       | Rv1599   | hisD     |
| lineage4.4.1.1 | S          | 355181    | 684        | G/A            | 228          | AAG/AAA      | K/K       | Rv0291   | mycP3    |
| lineage4.3     | LAM        | 764995    | 1626       | C/G            | 542          | GCC/GCG      | A/A       | Rv0668   | rpoC     |
| lineage4.1.2.1 | Haarlem    | 107794    | 195        | C/T            | 65           | GCC/GCT      | A/A       | Rv0098   | fcoT     |
| lineage4.1.1   | X          | 514245    | 1077       | C/T            | 359          | GTG/GTA      | V/V       | Rv0425c  | ctpH     |
| lineage4       | Lineage 4  | 931123    | 171        | T/C            | 57           | TAT/TAC      | Y/Y       | Rv0835   | lpqQ     |
| lineage3       | Lineage 3  | 3273107   | 894        | C/A            | 298          | GCC/GCA      | A/A       | Rv2936   | drpA     |
| lineage2       | Lineage 2  | 497491    | 810        | G/A            | 270          | GAC/GAT      | D/D       | Rv0411c  | glnH     |
| lineage1       | Lineage 1  | 615938    | 1104       | G/A            | 368          | GAG/GAA      | E/E       | Rv0524   | hemL     |

\*According to the reference genome NC\_000962.3

Table S3: Region information. Genes associated with resistance to anti-tuberculosis drugs

| Gene        | Resistance       | Position*       |
|-------------|------------------|-----------------|
| <i>eis</i>  | Kanamycin        | 2714124-2715332 |
| <i>embB</i> | Ethambutol       | 4246514-4249810 |
| <i>gyrA</i> | Fluoroquinolones | 7302-9818       |
| <i>gyrB</i> | Fluoroquinolones | 5240-7267       |
| <i>inhA</i> | Isoniazid        | 1674202-1675011 |
| <i>katG</i> | Isoniazid        | 2153889-2156111 |
| <i>pncA</i> | Pyrazinamide     | 2288681-2289241 |
| <i>rpoB</i> | Rifampicin       | 759807-763325   |
| <i>rrs</i>  | Streptomycin     | 1471846-1473382 |

\*According to the reference genome NC\_000962.3

Table S4. Primers designed for lineage pool

| <i>Gene</i>  | <i>Lineage</i> | <i>Fwd/Rev</i> | <i>Sequence 5'-3'</i> | <i>Amplicon size (bp)</i> |
|--------------|----------------|----------------|-----------------------|---------------------------|
| <i>ctpH</i>  | X              | Fwd            | GGAAAAGTGCCTCGACTGC   | 374                       |
|              |                | Rev            | GTTTCGCGCTGATCCAAG    |                           |
| <i>mycP3</i> | S              | Fwd            | TGACGGCTTCTCTGGTGTG   | 400                       |
|              |                | Rev            | GCCACCGACAACACGTAG    |                           |
| <i>fcoT</i>  | Haarlem        | Fwd            | GGTTCCGATCGCAGAGGA    | 320                       |
|              |                | Rev            | TTGATCGCCGGGAGTTGTAA  |                           |
| <i>rpoC</i>  | LAM            | Fwd            | CGCCGGAAATCATCGTCAAC  | 648                       |
|              |                | Rev            | TCGGTGGTCAGGTAGTACAG  |                           |
| <i>hemL</i>  | Lineage 1      | Fwd            | GAAGTGGTTGGTACGGAATC  | 372                       |
|              |                | Rev            | ATGGCATGAAAGAACGCTGG  |                           |
| <i>glnH</i>  | Lineage 2      | Fwd            | GATACAACGTGTTCCAGGTG  | 356                       |
|              |                | Rev            | GTCTACCTCGACGCCAAC    |                           |
| <i>drpA</i>  | Lineage 3      | Fwd            | TGAAGGATCTGGACGCTATC  | 201                       |
|              |                | Rev            | TCAGAGACTCGGTGGGATC   |                           |
| <i>lpqQ</i>  | Lineage 4      | Fwd            | GATCAGTCGTGTGTTGCTCC  | 269                       |
|              |                | Rev            | TACGGAACTCTGACCAGTCG  |                           |
| <i>hisD</i>  | Lineage 5      | Fwd            | TCTGGGAGAATGGTCTACGTG | 435                       |
|              |                | Rev            | CACCACGTTTCATCACCAC   |                           |
| <i>pykA</i>  | Lineage 6      | Fwd            | ACAAGGTCGCCTATGAGC    | 364                       |
|              |                | Rev            | GAGATCCTCGATGTCCTTC   |                           |
| <i>glmU</i>  | Lineage 7      | Fwd            | CTGGCATGTACGGTCTGG    | 212                       |
|              |                | Rev            | GATGATCCCTTCGGCTAC    |                           |
| <i>alkA</i>  | Bovis          | Fwd            | GGCCTTCGTCGATACCTG    | 732                       |
|              |                | Rev            | AATGGAATGTGCGTAGTGAC  |                           |

Table S5. Primers designed for resistance pool

| <i>Gen</i>  | <i>Resistance</i> | <i>Fwd/Rev</i> | <i>Sequence 5'-3'</i> | <i>Amplicon size (bp)</i> |
|-------------|-------------------|----------------|-----------------------|---------------------------|
| <i>eis</i>  | Kanamycin         | Fwd            | AAAGCCCGTCAGCCTAGC    | 1280                      |
|             |                   | Rev            | ATCGCGTGATCCTTTGCC    |                           |
| <i>embB</i> | Ethambutol        | Fwd1           | GGATCGGTGGAGCAGTACC   | 1281                      |
|             |                   | Rev1           | GTTGTTGAACGGCATCCAC   |                           |
|             |                   | Fwd2           | TACCGCCGCATTCACACT    | 1080                      |
|             |                   | Rev2           | GGCTGGTTGGGTTTCATCACG |                           |
|             |                   | Fwd3           | GAGTCCTGGCATCAATGGTT  | 978                       |
|             |                   | Rev3           | CCAACACCCCTGCGCCGAC   |                           |
| <i>gyrA</i> | Fluoroquinolones  | Fwd            | AAACGAGGAATAGATGACAG  | 2588                      |
|             |                   | Rev            | CACCCCGACTCCTAACACTC  |                           |
| <i>gyrB</i> | Fluoroquinolones  | Fwd            | GGGTAAAAACGAGGCCAGA   | 2114                      |
|             |                   | Rev            | CAGGGTTGCGTTAGACATCC  |                           |
| <i>inhA</i> | Isoniazid         | Fwd            | GGCCACTGACACAACACAAG  | 825                       |
|             |                   | Rev            | CAGCAGGACGGCATCAAATTG |                           |
| <i>katG</i> | Isoniazid         | Fwd1           | CGATCAACCCGAATCAGC    | 1141                      |
|             |                   | Rev1           | GGTGGATCCGATCTATGAGC  |                           |
|             |                   | Fwd2           | GTCAGTGGCCAGCATCGTCG  | 1044                      |
|             |                   | Rev2           | GATCACAGCCCGATAACACC  |                           |
| <i>pncA</i> | Pyrazinamide      | Fwd            | AACAGTTCATCCCGGTTCG   | 575                       |
|             |                   | Rev            | GTCGCCCGAACGTATGGTG   |                           |
| <i>rpoB</i> | Rifampicin        | Fwd1           | GATTCCCGCCAGAGCAAAAC  | 1281                      |
|             |                   | Rev1           | TAGTCCACCTCAGACGAGGG  |                           |
|             |                   | Fwd2           | CCCTCGTCTGAGGTGGACTA  | 906                       |
|             |                   | Rev2           | GTCGAGCACGTAACTCCCTT  |                           |
| <i>rrs</i>  | Streptomycin      | Fwd            | TCCAAAGGGAGTGTTTGGGT  | 1594                      |
|             |                   | Rev            | CAGTTGGGGCGTTTTCTGTG  |                           |

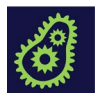

Table S6. Coverage by sequenced resistance regions.

| Coverage (resistance regions) |       | (nreads x reads length/amplicon length) |      |      |       |       |       |        |        |
|-------------------------------|-------|-----------------------------------------|------|------|-------|-------|-------|--------|--------|
|                               | rrs   | embB                                    | gyrA | gyrB | inhA  | eis   | katG  | pncA   | rpoB   |
| Sample/amplified length       | 1594  | 3339                                    | 2588 | 2114 | 825   | 1280  | 2185  | 575    | 2187   |
| 1                             | 1277  | 11                                      | 204  | 34   | 2445  | 1379  | 988   | 896    | 1712   |
| 2                             | 5113  | 29                                      | 941  | 384  | 11444 | 5261  | 6633  | 29057  | 10846  |
| 3                             | 13470 | 11                                      | 2703 | 719  | 19518 | 8582  | 7318  | 5516   | 15117  |
| 4                             | 7484  | 7                                       | 1045 | 197  | 10479 | 6986  | 5178  | 4056   | 10509  |
| 5                             | 147   | 8                                       | 23   | 14   | 37089 | 14779 | 11925 | 2100   | 32776  |
| 6                             | 14669 | 4                                       | 1243 | 246  | 21347 | 13840 | 9432  | 665    | 18266  |
| 7                             | 7101  | 105                                     | 1244 | 251  | 10634 | 6756  | 5674  | 43491  | 9637   |
| 8                             | 8801  | 146                                     | 1393 | 205  | 16456 | 7895  | 9688  | 0      | 13179  |
| 9                             | 3330  | 7                                       | 275  | 33   | 9335  | 5278  | 5308  | 24     | 25953  |
| 10                            | 2749  | 20                                      | 446  | 52   | 6077  | 3609  | 3003  | 175831 | 4459   |
| 11                            | 1530  | 28                                      | 273  | 41   | 4131  | 1709  | 1594  | 40     | 2715   |
| 12                            | 1463  | 2                                       | 221  | 35   | 8100  | 3442  | 4409  | 892    | 7912   |
| 13                            | 446   | 6                                       | 133  | 6    | 672   | 390   | 335   | 1857   | 18610  |
| 14                            | 2468  | 0                                       | 141  | 11   | 858   | 137   | 121   | 2637   | 102603 |
| 15                            | 3753  | 25                                      | 377  | 140  | 5306  | 3160  | 3636  | 17333  | 6100   |
| 16                            | 527   | 1                                       | 5    | 8    | 160   | 5     | 65    | 1339   | 22455  |
| 17                            | 1143  | 9                                       | 137  | 24   | 3189  | 1896  | 974   | 4223   | 2297   |
| 18                            | 5603  | 75                                      | 910  | 104  | 14057 | 7944  | 5940  | 1796   | 11903  |
| 19                            | 7520  | 38                                      | 1466 | 128  | 31330 | 17092 | 10301 | 18286  | 22489  |
| 20                            | 874   | 1                                       | 57   | 10   | 756   | 12    | 69    | 3083   | 21432  |
| 21                            | 4768  | 223                                     | 1151 | 349  | 16081 | 7098  | 9274  | 1624   | 11306  |
| 22                            | 567   | 3                                       | 115  | 7    | 699   | 215   | 147   | 2477   | 30185  |
| 23                            | 5     | 1                                       | 2    | 1    | 7005  | 45    | 7     | 116578 | 183    |
| 24                            | 789   | 10                                      | 87   | 2    | 2383  | 1111  | 537   | 7297   | 38689  |
| 25                            | 274   | 9                                       | 41   | 1    | 404   | 195   | 96    | 1028   | 21205  |
| 26                            | 31    | 7                                       | 2    | 0    | 2427  | 52    | 22    | 12796  | 23015  |
| 27                            | 6     | 2                                       | 6    | 1    | 10    | 13    | 3     | 18     | 15     |
| 28                            | 28    | 22                                      | 33   | 19   | 61    | 56    | 26    | 45     | 81     |
| 29                            | 1341  | 4                                       | 5    | 31   | 47    | 12    | 159   | 1538   | 25590  |
| 30                            | 732   | 4                                       | 2    | 1    | 1976  | 67    | 12    | 7846   | 12746  |
| 31                            | 8     | 5                                       | 7    | 2    | 144   | 31    | 13    | 144772 | 57     |
| 32                            | 2008  | 2                                       | 45   | 32   | 608   | 8     | 181   | 5346   | 50573  |
| 33                            | 607   | 1                                       | 2    | 12   | 54    | 47    | 107   | 1379   | 19825  |
| 34                            | 767   | 5                                       | 2    | 1    | 1394  | 32    | 151   | 7022   | 15031  |
| 35                            | 369   | 5                                       | 55   | 2    | 560   | 217   | 120   | 1722   | 14412  |
| 36                            | 650   | 2                                       | 100  | 5    | 795   | 306   | 200   | 1846   | 19495  |
| 37                            | 289   | 3                                       | 47   | 2    | 279   | 169   | 102   | 830    | 12641  |
| 38                            | 4     | 3                                       | 18   | 1    | 3670  | 30    | 154   | 888442 | 166    |
| 39                            | 2     | 1                                       | 1    | 1    | 58    | 3     | 2     | 7      | 10     |
| 40                            | 1501  | 2                                       | 124  | 31   | 1321  | 17    | 208   | 3713   | 49336  |
| 41                            | 249   | 2                                       | 16   | 4    | 241   | 6     | 47    | 707    | 7932   |
| 42                            | 606   | 1                                       | 106  | 2    | 781   | 226   | 91    | 2673   | 31688  |
| 43                            | 412   | 2                                       | 81   | 3    | 527   | 181   | 85    | 1541   | 17231  |
| 44                            | 824   | 1                                       | 82   | 12   | 786   | 51    | 119   | 1858   | 18655  |
| 45                            | 1053  | 2                                       | 2    | 10   | 100   | 6     | 118   | 2322   | 31257  |
| 46                            | 365   | 5                                       | 11   | 10   | 168   | 9     | 53    | 603    | 11972  |
| 47                            | 1158  | 9                                       | 67   | 4    | 1960  | 221   | 545   | 8136   | 9567   |
| H37                           | 850   | 1                                       | 161  | 4    | 793   | 369   | 183   | 1849   | 29213  |
| Mean                          | 2286  | 18                                      | 325  | 67   | 5390  | 2520  | 2195  | 32065  | 17980  |
| SD                            | 3357  | 41                                      | 552  | 133  | 8281  | 4233  | 3431  | 131229 | 17489  |

Table S7. Coverage by sequenced lineage regions.

| Coverage                | (nreads x reads length/amplicon length) |           |           |           |         |       |       |       |           |           |           |
|-------------------------|-----------------------------------------|-----------|-----------|-----------|---------|-------|-------|-------|-----------|-----------|-----------|
|                         | Lineage 1                               | Lineage 2 | Lineage 3 | Lineage 4 | Haarlem | LAM   | S     | X     | Lineage 5 | Lineage 6 | Lineage 7 |
| Sample/amplified length | 372                                     | 356       | 201       | 269       | 320     | 648   | 400   | 374   | 435       | 364       | 212       |
| 1                       | 174                                     | 868       | 238       | 350       | 3535    | 824   | 609   | 801   | 229       | 772       | 342       |
| 2                       | 1224                                    | 5248      | 3133      | 2409      | 22272   | 2222  | 2377  | 3345  | 1087      | 3748      | 2760      |
| 3                       | 1726                                    | 8318      | 2399      | 3156      | 34521   | 6668  | 5019  | 6290  | 1650      | 6665      | 3189      |
| 4                       | 260                                     | 5229      | 1735      | 2054      | 22810   | 4582  | 3278  | 4074  | 239       | 4307      | 2128      |
| 5                       | 647                                     | 18396     | 4995      | 7320      | 82917   | 8169  | 8108  | 12748 | 657       | 13087     | 6669      |
| 6                       | 1358                                    | 7909      | 2322      | 3123      | 41447   | 4628  | 4595  | 6268  | 1352      | 6412      | 3178      |
| 7                       | 2076                                    | 5759      | 1756      | 2323      | 19187   | 5956  | 4225  | 6189  | 2447      | 6307      | 2228      |
| 8                       | 2496                                    | 6016      | 2446      | 3174      | 30906   | 4149  | 5025  | 6650  | 2420      | 6237      | 3059      |
| 9                       | 1192                                    | 3421      | 1045      | 1400      | 27144   | 1306  | 1382  | 2259  | 1047      | 1927      | 1496      |
| 10                      | 808                                     | 2341      | 641       | 811       | 9275    | 1396  | 1425  | 1914  | 856       | 1720      | 753       |
| 11                      | 37                                      | 1759      | 502       | 583       | 4748    | 1272  | 898   | 943   | 16        | 1188      | 516       |
| 12                      | 913                                     | 2814      | 990       | 1148      | 18359   | 735   | 971   | 1727  | 897       | 1604      | 1462      |
| 13                      | 1                                       | 1455      | 1040      | 701       | 12      | 564   | 323   | 10    | 12        | 933       | 763       |
| 14                      | 6                                       | 1753      | 1029      | 1233      | 47      | 646   | 699   | 43    | 9         | 1101      | 763       |
| 15                      | 531                                     | 1613      | 687       | 653       | 11508   | 819   | 632   | 913   | 517       | 916       | 763       |
| 16                      | 18                                      | 943       | 726       | 650       | 70      | 342   | 93    | 89    | 14        | 32        | 420       |
| 17                      | 373                                     | 1275      | 385       | 380       | 3899    | 938   | 583   | 864   | 459       | 880       | 354       |
| 18                      | 1967                                    | 5352      | 1120      | 1539      | 20963   | 3770  | 2728  | 4159  | 2170      | 3932      | 1563      |
| 19                      | 5021                                    | 16342     | 3670      | 5885      | 36205   | 12799 | 11506 | 14317 | 5532      | 14619     | 5110      |
| 20                      | 1                                       | 1896      | 969       | 1094      | 141     | 539   | 534   | 2     | 16        | 289       | 509       |
| 21                      | 2934                                    | 9737      | 2319      | 3086      | 24336   | 4247  | 3683  | 5923  | 3144      | 5679      | 3410      |
| 22                      | 3                                       | 2287      | 1405      | 1306      | 152     | 695   | 759   | 8     | 20        | 249       | 919       |
| 23                      | 13                                      | 48031     | 2596      | 14442     | 59      | 644   | 3779  | 30    | 9         | 2105      | 1768      |
| 24                      | 4                                       | 5211      | 3638      | 2929      | 23      | 1036  | 1361  | 3     | 2         | 1148      | 2387      |
| 25                      | 1                                       | 862       | 510       | 535       | 13      | 292   | 275   | 2     | 2         | 466       | 432       |
| 26                      | 2                                       | 5543      | 992       | 2805      | 2       | 191   | 851   | 7     | 1         | 261       | 611       |
| 27                      | 49                                      | 715231    | 6081      | 81443     | 2       | 201   | 6795  | 107   | 37        | 1395      | 7015      |
| 28                      | 577                                     | 2120666   | 24266     | 147839    | 54      | 4011  | 18322 | 505   | 350       | 10916     | 35571     |
| 29                      | 6                                       | 2236      | 1514      | 1418      | 16      | 50    | 29    | 8     | 3         | 6         | 756       |
| 30                      | 17                                      | 7238      | 4677      | 4212      | 41      | 1912  | 938   | 2     | 4         | 215       | 3105      |
| 31                      | 18                                      | 35250     | 1182      | 6502      | 37      | 25    | 465   | 88    | 16        | 225       | 1533      |
| 32                      | 6                                       | 4896      | 3208      | 3292      | 12      | 351   | 153   | 10    | 17        | 19        | 1710      |
| 33                      | 2                                       | 1071      | 649       | 598       | 20      | 330   | 254   | 12    | 27        | 66        | 400       |
| 34                      | 1                                       | 4835      | 2761      | 3031      | 30      | 896   | 473   | 1     | 20        | 80        | 1499      |
| 35                      | 4                                       | 1566      | 1091      | 1032      | 21      | 538   | 552   | 40    | 19        | 120       | 764       |
| 36                      | 11                                      | 1900      | 1482      | 1197      | 75      | 677   | 689   | 8     | 24        | 213       | 1040      |
| 37                      | 6                                       | 830       | 701       | 603       | 411     | 30    | 17    | 32    | 7         | 2         | 463       |
| 38                      | 23                                      | 71        | 42        | 51        | 203     | 21    | 31    | 28    | 13        | 40        | 104       |
| 39                      | 4                                       | 126803    | 2770      | 20566     | 119     | 26    | 595   | 18    | 8         | 215       | 2217      |
| 40                      | 26                                      | 3364      | 2374      | 2095      | 59      | 1129  | 978   | 0     | 1         | 306       | 1563      |
| 41                      | 3                                       | 471       | 260       | 247       | 94      | 132   | 153   | 7     | 1         | 267       | 211       |
| 42                      | 2                                       | 2136      | 1146      | 1272      | 57      | 663   | 928   | 6     | 34        | 526       | 753       |
| 43                      | 5                                       | 1279      | 872       | 833       | 47      | 495   | 438   | 1     | 7         | 167       | 550       |
| 44                      | 10                                      | 1434      | 890       | 949       | 47      | 535   | 617   | 7     | 2         | 668       | 726       |
| 45                      | 1                                       | 1191      | 593       | 843       | 11      | 251   | 393   | 18    | 16        | 60        | 339       |
| 46                      | 3                                       | 508       | 375       | 280       | 1       | 221   | 190   | 1     | 19        | 101       | 230       |
| 47                      | 1                                       | 8099      | 5800      | 4189      | 15      | 1812  | 1929  | 8     | 2         | 1921      | 3933      |
| H37Rv                   | 3                                       | 1750      | 1207      | 1025      | 47      | 744   | 298   | 20    | 11        | 47        | 789       |
| Mean                    | 512                                     | 66942     | 2234      | 7263      | 8666    | 1760  | 2103  | 1677  | 530       | 2170      | 2350      |
| SD                      | 991                                     | 320060    | 3556      | 23912     | 16115   | 2517  | 3354  | 3226  | 1063      | 3423      | 5143      |
